# Supplementary material for: Synthesis of New Norfloxacin–Tin Complexes to Mitigate the Effect of Ultraviolet-Visible Irradiation in Polyvinyl Chloride Films
Source: Polymers (Basel). 2022 Jul 10;14(14):2812. doi: 10.3390/polym14142812 (PMC9324004; doi:10.3390/polym14142812)
Supplement: Supplementary file 1 [file polymers-14-02812-s001.zip › polymers-1784690-supplementary.pdf]

# Synthesis of New Norfloxacin-Tin Complexes to Mitigate the Effect of Ultraviolet-Visible Irradiation in Polyvinyl Chloride Films

Marwa Fadhil <sup>1</sup>, Emad Yousif <sup>1</sup>, Dina S. Ahmed <sup>2</sup>, Alaa Mohammed <sup>3</sup>, Hassan Hashim <sup>4</sup>, Ahmed Ahmed <sup>5</sup>, Benson M. Kariuki <sup>6</sup> and Gamal A. El-Hiti <sup>7,\*</sup>

<sup>1</sup> Department of Chemistry, College of Science, Al-Nahrain University, Baghdad 64021, Iraq; st.marwa.hameed@ced.nahrainuniv.edu.iq (M.F.); emad.yousif@ced.nahrainuniv.edu.iq (E.Y.)

<sup>2</sup> Department of Medical Instrumentation Engineering, Al-Mansour University College, Baghdad 64021, Iraq; dina.saadi@muc.edu.iq

<sup>3</sup> Department of Medical Instrumentation Technical Engineering, Al-Hadi University College, Baghdad 64021, Iraq; dr.alaa.bader@huc.edu.iq

<sup>4</sup> Department of Physics, College of Science, Al-Nahrain University, Baghdad 64021, Iraq; hassan.hashim@nahrainuniv.edu.iq

<sup>5</sup> Polymer Research Unit, College of Science, Al-Mustansiriyah University, Baghdad 10052, Iraq; dr\_ahmedabd@uomustansiriyah.edu.iq

<sup>6</sup> School of Chemistry, Cardiff University, Main Building, Park Place, Cardiff CF10 3AT, UK; kariukib@cardiff.ac.uk

<sup>7</sup> Department of Optometry, College of Applied Medical Sciences, King Saud University, Riyadh 11433, Saudi Arabia

\* Correspondence: gelhiti@ksu.edu.sa; Tel.: +966-11469-3778; Fax: +966-11469-3536

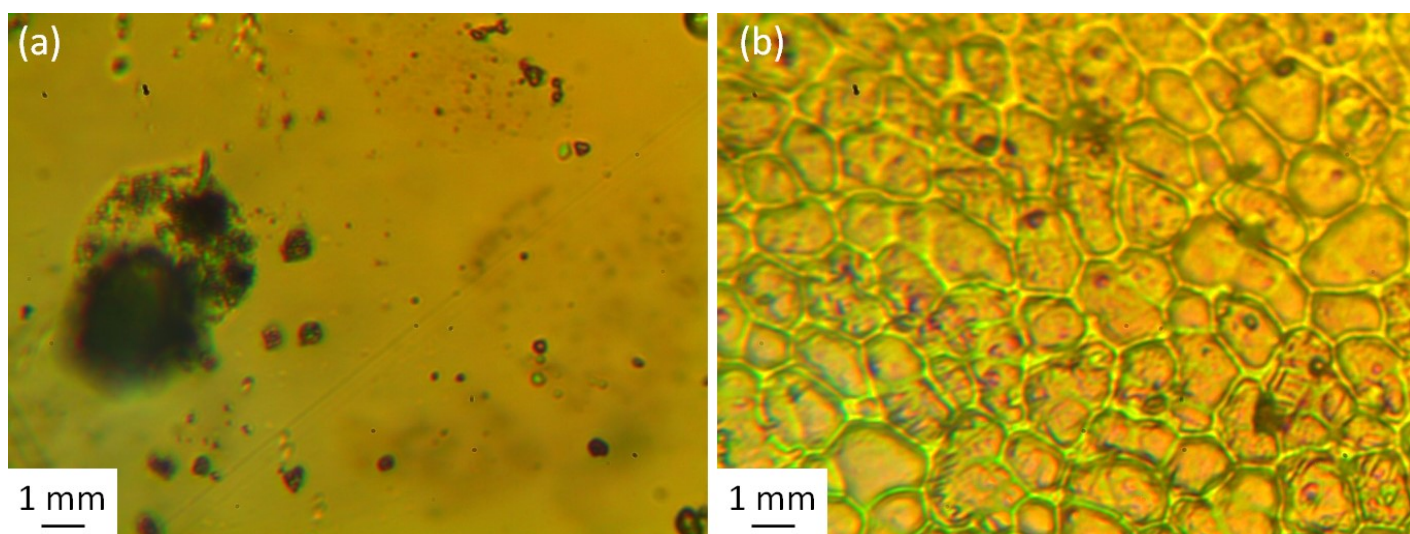

**Figure S1.** Microscopy images (400× magnification) of unblended PVC film (a): before irradiation and (b): after irradiation.

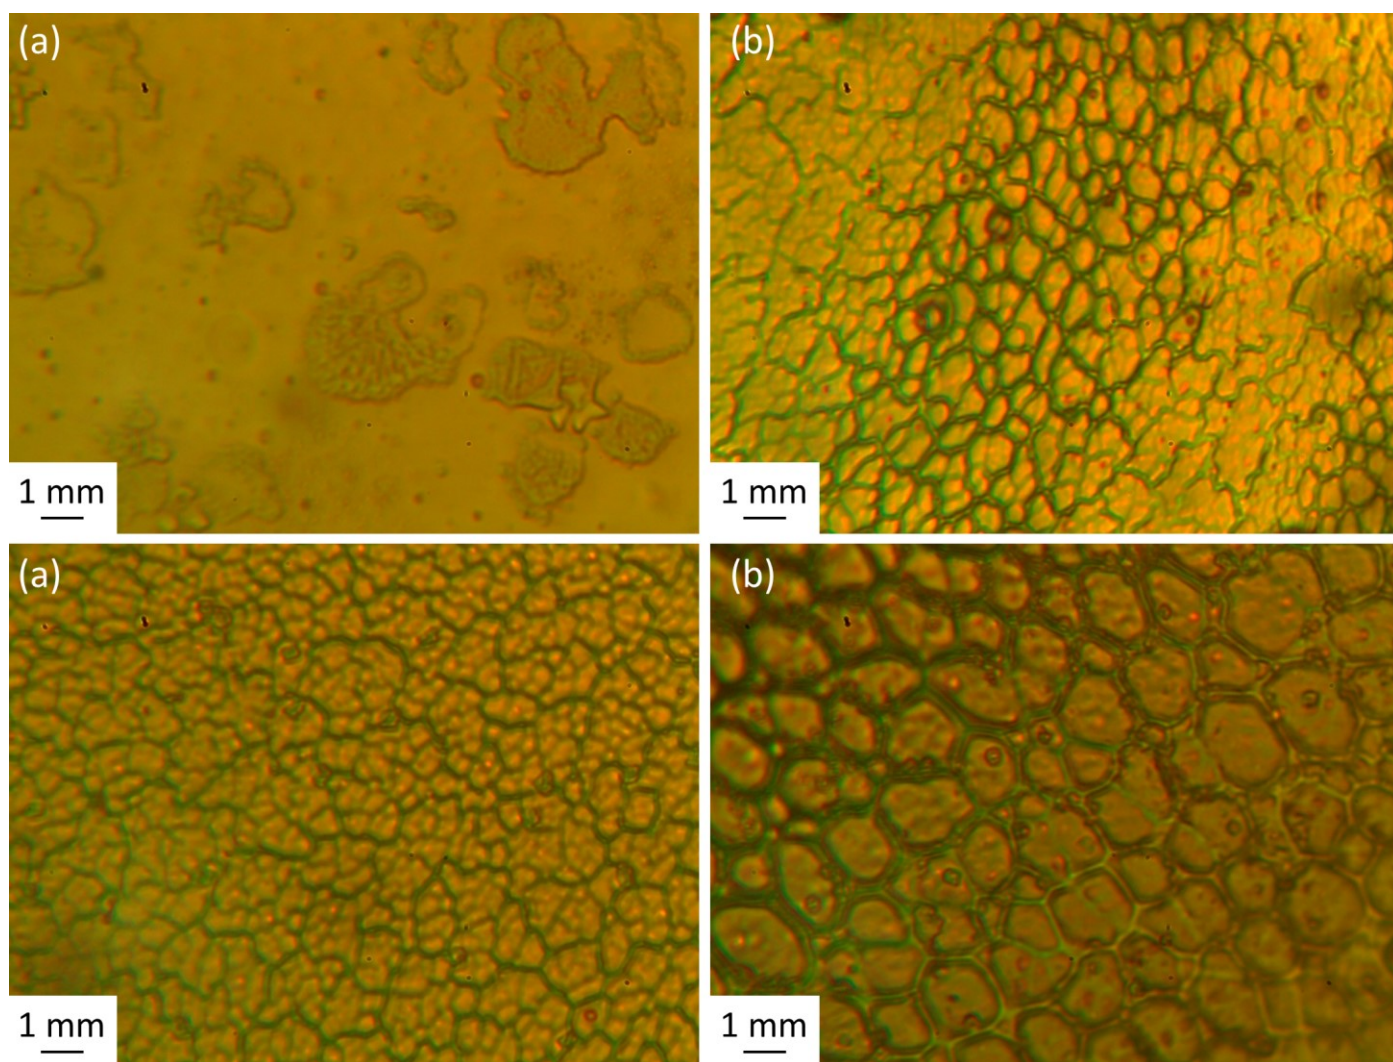

**Figure S2.** Microscopy images (400× magnification) of irradiated PVC films containing (a) complex 1, (b): complex 2, (c): complex 3, and (d): complex 4.

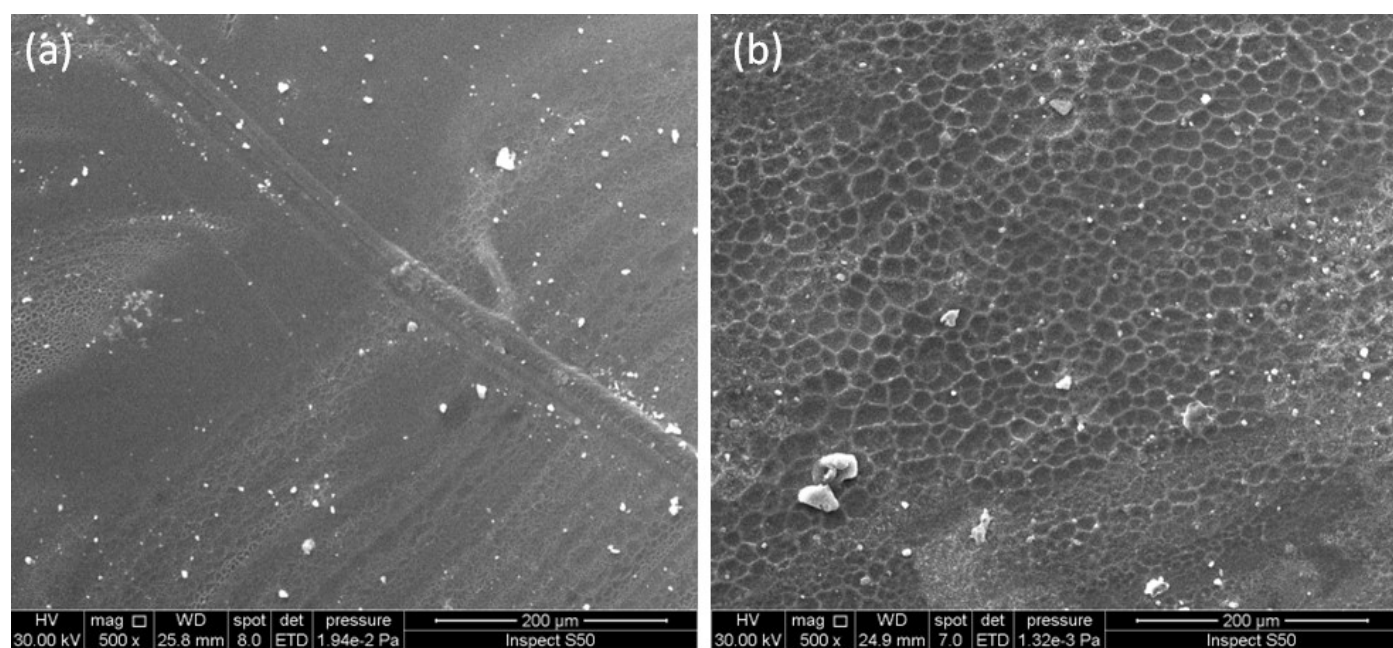

**Figure S3.** SEM images of PVC film (a): before irradiation and (b): after irradiation.

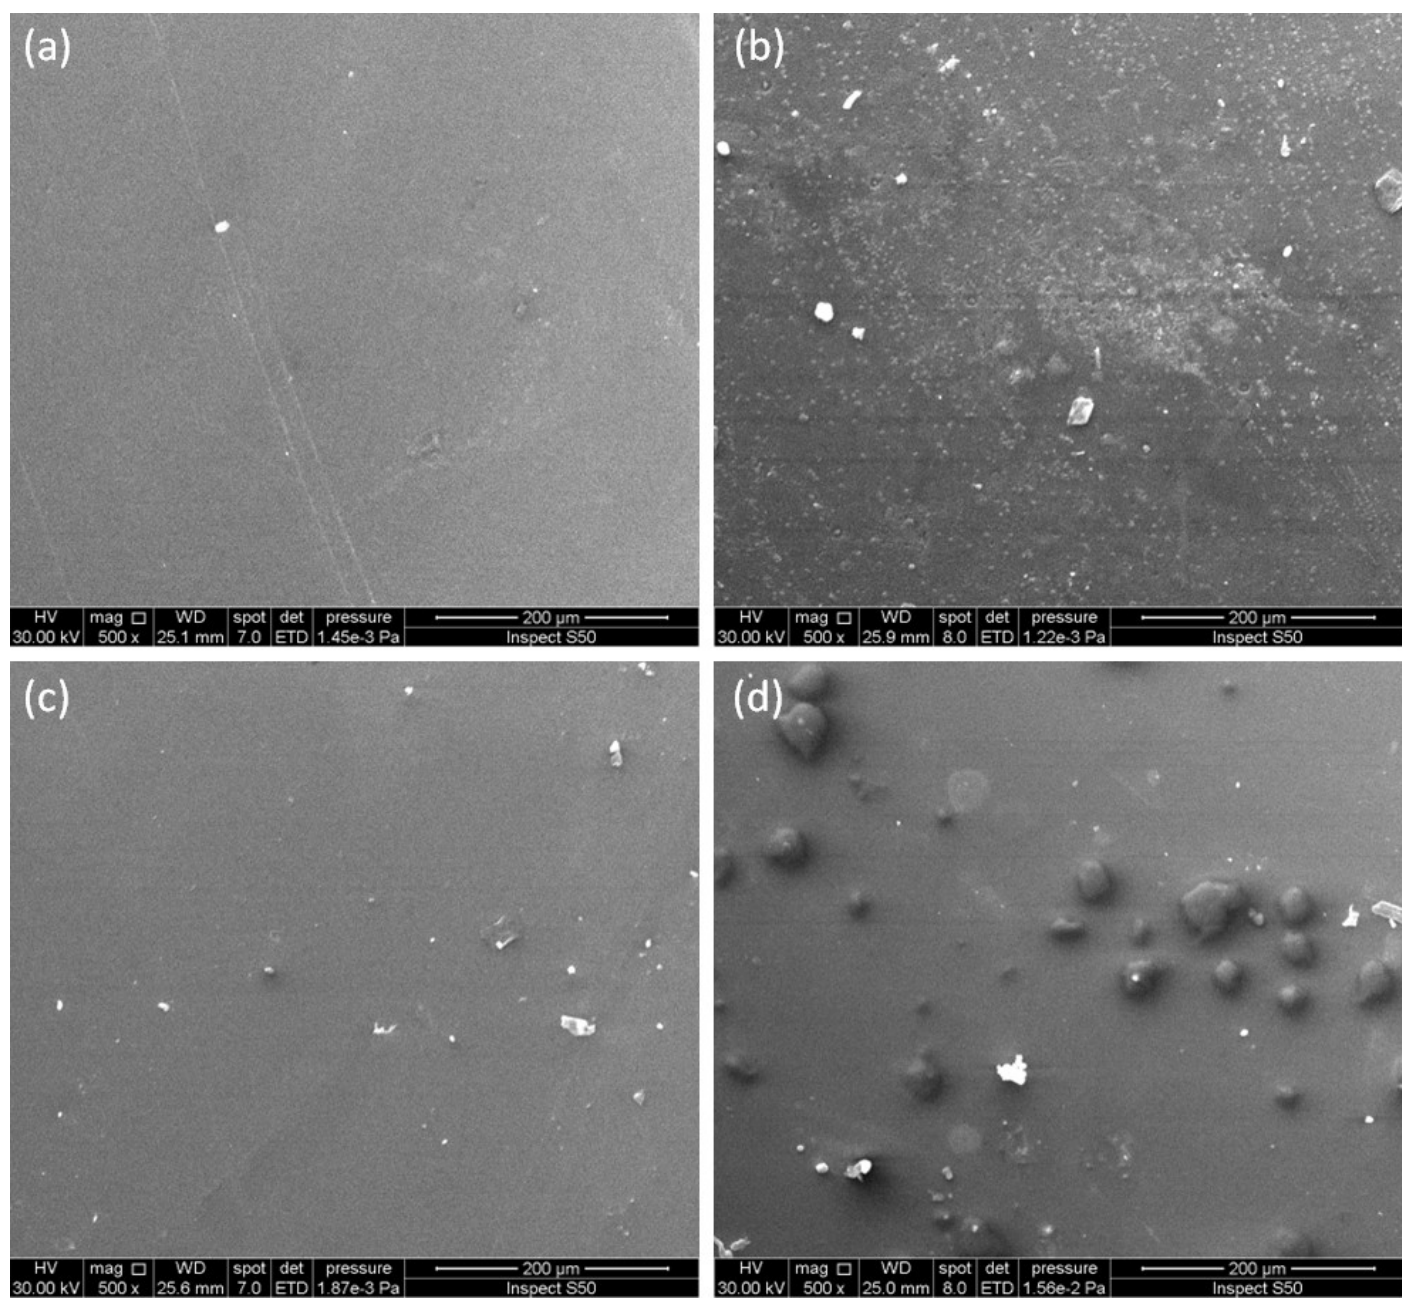

**Figure S4.** SEM images of irradiated PVC films containing (a) complex 1, (b): complex 2, (c): complex 3, and (d): complex 4.

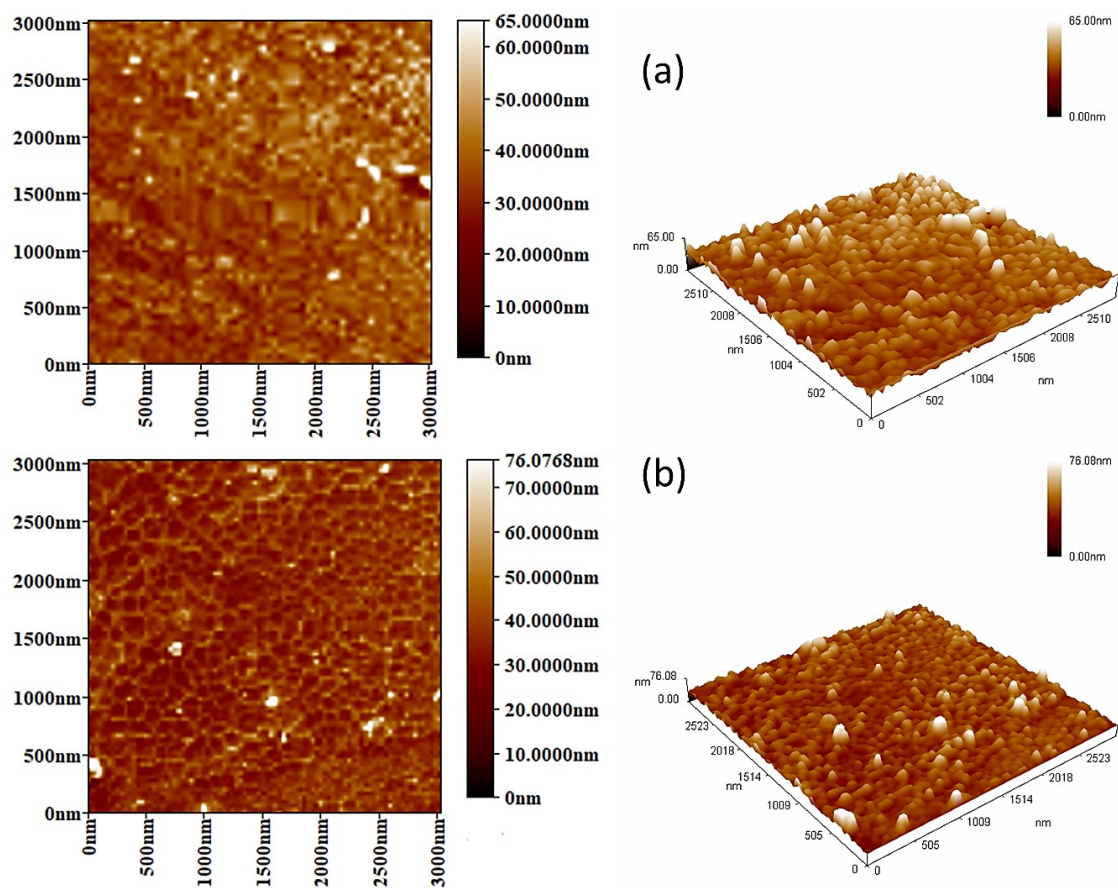

**Figure S5.** Two- and three-dimensional AFM images of the blank PVC film (a): before irradiation and (b): after irradiation.

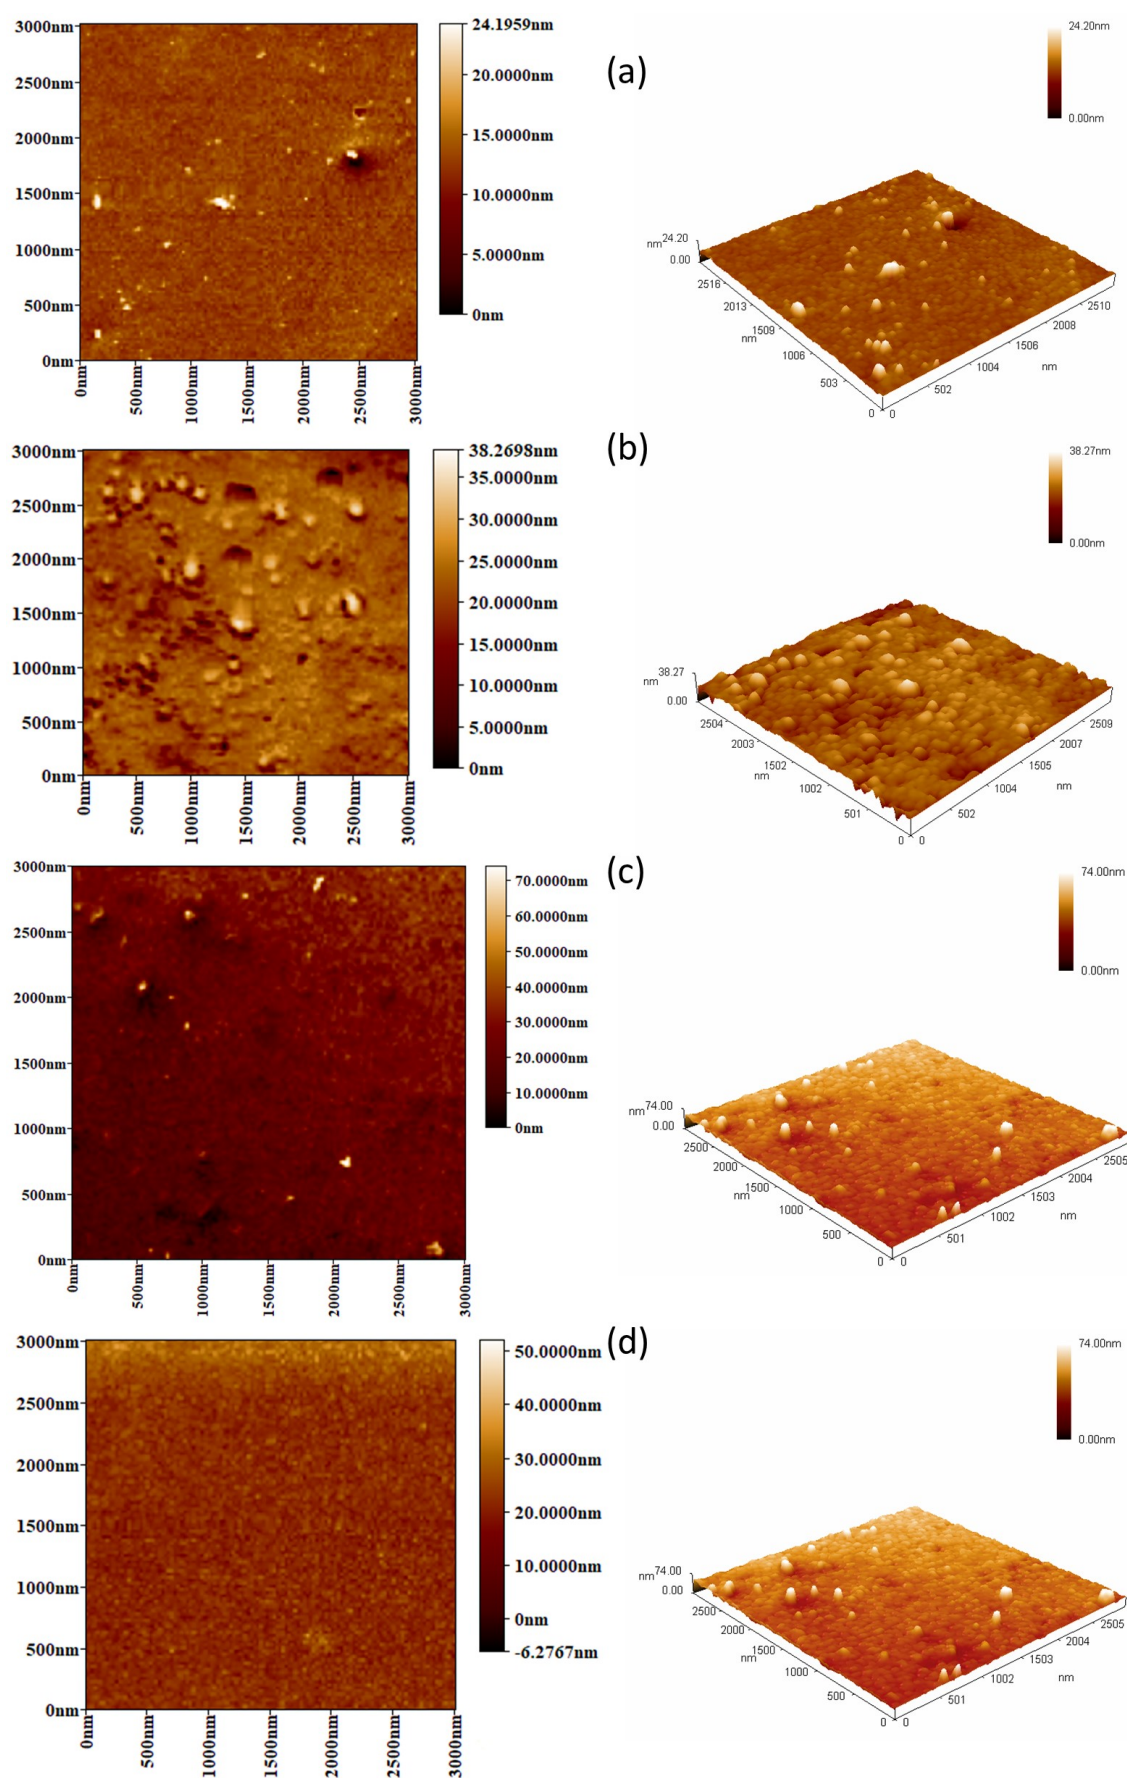

**Figure S6.** Two- and three-dimensional AFM images of irradiated PVC films containing (a) complex 1, (b): complex 2, (c): complex 3, and (d): complex 4.
